# Supplementary material for: Oncolytic peptide LTX-315 induces anti-pancreatic cancer immunity by targeting the ATP11B-PD-L1 axis
Source: PubMed Central journal article supplement (PMC8921947; doi:10.1136/jitc-2021-004129), 2022-03-14
Supplement: jitc-2021-004129supp001.pdf [file jitc-2021-004129supp001.pdf]

A

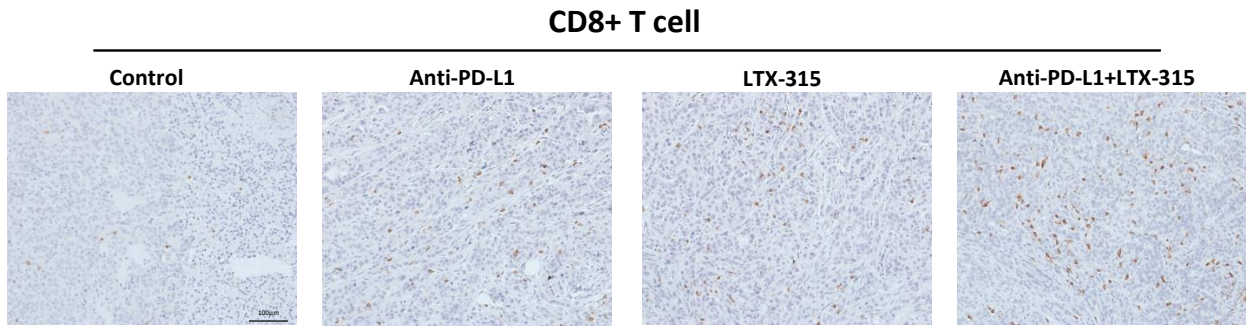

B

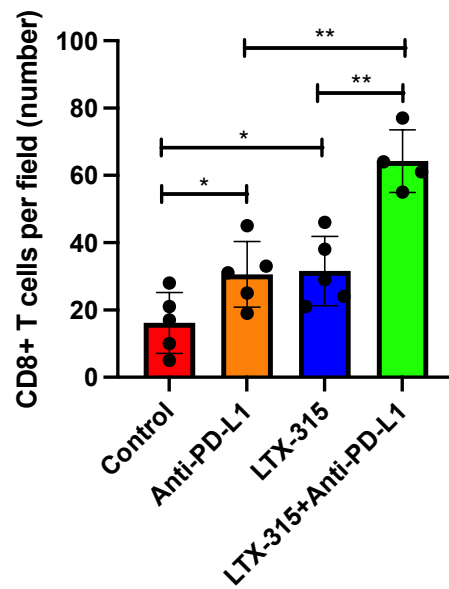

C

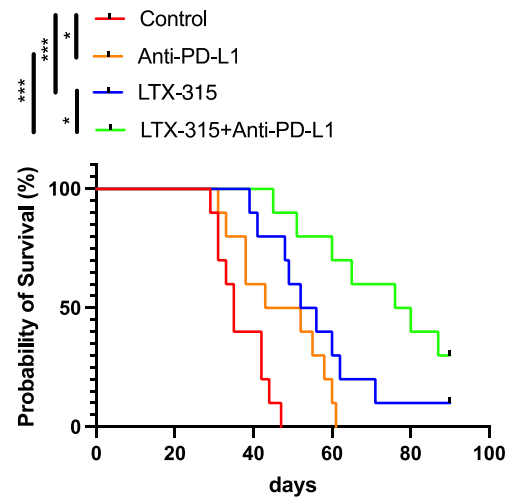

Figure S1

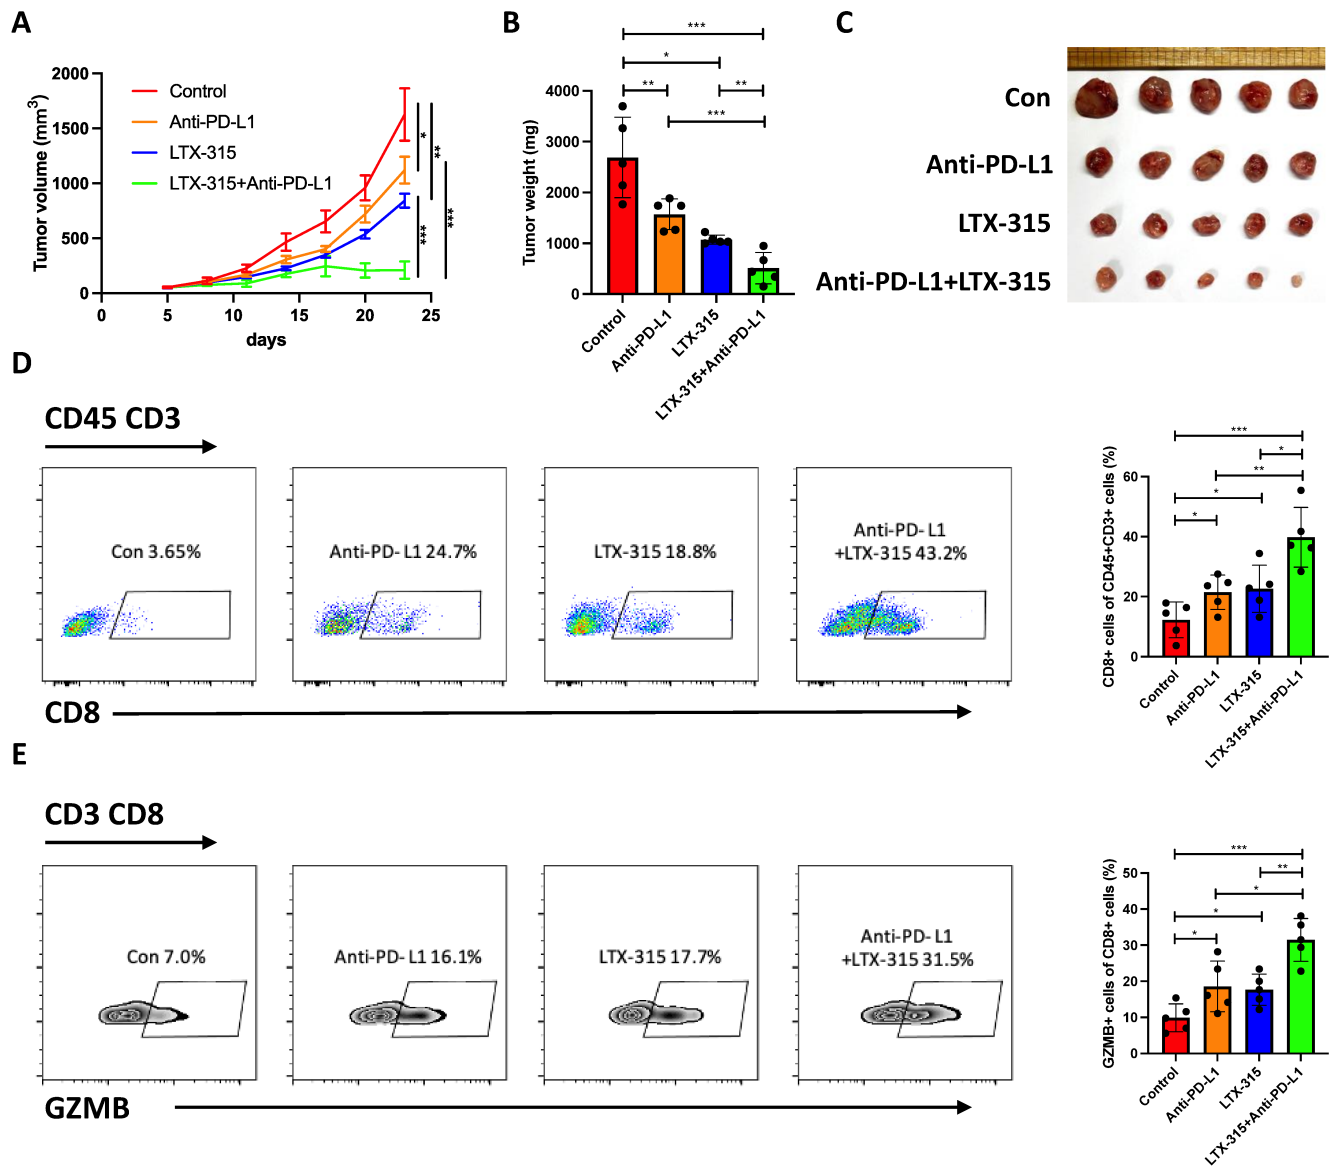

Figure S2

**A**

|                              | LTX-315 |       |       |       |       |       | Control |       |       |       |       |       | Correlation | RMSE  |       |
|------------------------------|---------|-------|-------|-------|-------|-------|---------|-------|-------|-------|-------|-------|-------------|-------|-------|
|                              | 1       | 2     | 3     | 4     | 5     | 6     | 1       | 2     | 3     | 4     | 5     | 6     |             |       |       |
| B cells naive                | 0.075   | 0.072 | 0.072 | 0.072 | 0.072 | 0.072 | 0.046   | 0.012 | 0.012 | 0.012 | 0.012 | 0.012 | 0.000       | 0.813 | 0.655 |
| B cells memory               | 0.043   | 0.02  | 0.023 | 0.023 | 0.023 | 0.023 | 0.049   | 0.015 | 0.015 | 0.015 | 0.015 | 0.015 | 0.000       | 0.801 | 0.684 |
| Plasma cells                 | 0.043   | 0.02  | 0.023 | 0.023 | 0.023 | 0.023 | 0.049   | 0.015 | 0.015 | 0.015 | 0.015 | 0.015 | 0.000       | 0.791 | 0.660 |
| T cells CD8 naive            | 0.043   | 0.02  | 0.023 | 0.023 | 0.023 | 0.023 | 0.049   | 0.015 | 0.015 | 0.015 | 0.015 | 0.015 | 0.000       | 0.810 | 0.675 |
| T cells CD4 memory resting   | 0.043   | 0.02  | 0.023 | 0.023 | 0.023 | 0.023 | 0.049   | 0.015 | 0.015 | 0.015 | 0.015 | 0.015 | 0.000       | 0.809 | 0.700 |
| T cells CD4 memory activated | 0.043   | 0.02  | 0.023 | 0.023 | 0.023 | 0.023 | 0.049   | 0.015 | 0.015 | 0.015 | 0.015 | 0.015 | 0.000       | 0.782 | 0.702 |
| T cells CD4 memory helper    | 0.043   | 0.02  | 0.023 | 0.023 | 0.023 | 0.023 | 0.049   | 0.015 | 0.015 | 0.015 | 0.015 | 0.015 | 0.000       | 0.804 | 0.668 |
| T cells regulatory (Treg)    | 0.043   | 0.02  | 0.023 | 0.023 | 0.023 | 0.023 | 0.049   | 0.015 | 0.015 | 0.015 | 0.015 | 0.015 | 0.000       | 0.807 | 0.662 |
| T cells gamma delta          | 0.043   | 0.02  | 0.023 | 0.023 | 0.023 | 0.023 | 0.049   | 0.015 | 0.015 | 0.015 | 0.015 | 0.015 | 0.000       | 0.841 | 0.640 |
| NK cells resting             | 0.043   | 0.02  | 0.023 | 0.023 | 0.023 | 0.023 | 0.049   | 0.015 | 0.015 | 0.015 | 0.015 | 0.015 | 0.000       | 0.800 | 0.680 |
| NK cells activated           | 0.043   | 0.02  | 0.023 | 0.023 | 0.023 | 0.023 | 0.049   | 0.015 | 0.015 | 0.015 | 0.015 | 0.015 | 0.000       | 0.800 | 0.680 |
| Monocytes M0                 | 0.043   | 0.02  | 0.023 | 0.023 | 0.023 | 0.023 | 0.049   | 0.015 | 0.015 | 0.015 | 0.015 | 0.015 | 0.000       | 0.800 | 0.680 |
| Neutrophils                  | 0.043   | 0.02  | 0.023 | 0.023 | 0.023 | 0.023 | 0.049   | 0.015 | 0.015 | 0.015 | 0.015 | 0.015 | 0.000       | 0.800 | 0.680 |
| Macrophages M1               | 0.043   | 0.02  | 0.023 | 0.023 | 0.023 | 0.023 | 0.049   | 0.015 | 0.015 | 0.015 | 0.015 | 0.015 | 0.000       | 0.800 | 0.680 |
| Macrophages M2               | 0.043   | 0.02  | 0.023 | 0.023 | 0.023 | 0.023 | 0.049   | 0.015 | 0.015 | 0.015 | 0.015 | 0.015 | 0.000       | 0.800 | 0.680 |
| Dendritic cells resting      | 0.043   | 0.02  | 0.023 | 0.023 | 0.023 | 0.023 | 0.049   | 0.015 | 0.015 | 0.015 | 0.015 | 0.015 | 0.000       | 0.800 | 0.680 |
| Dendritic cells activated    | 0.043   | 0.02  | 0.023 | 0.023 | 0.023 | 0.023 | 0.049   | 0.015 | 0.015 | 0.015 | 0.015 | 0.015 | 0.000       | 0.800 | 0.680 |
| Mast cells resting           | 0.043   | 0.02  | 0.023 | 0.023 | 0.023 | 0.023 | 0.049   | 0.015 | 0.015 | 0.015 | 0.015 | 0.015 | 0.000       | 0.800 | 0.680 |
| Mast cells activated         | 0.043   | 0.02  | 0.023 | 0.023 | 0.023 | 0.023 | 0.049   | 0.015 | 0.015 | 0.015 | 0.015 | 0.015 | 0.000       | 0.800 | 0.680 |
| Eosinophils                  | 0.043   | 0.02  | 0.023 | 0.023 | 0.023 | 0.023 | 0.049   | 0.015 | 0.015 | 0.015 | 0.015 | 0.015 | 0.000       | 0.800 | 0.680 |
| Basophils                    | 0.043   | 0.02  | 0.023 | 0.023 | 0.023 | 0.023 | 0.049   | 0.015 | 0.015 | 0.015 | 0.015 | 0.015 | 0.000       | 0.800 | 0.680 |

**Figure S3**

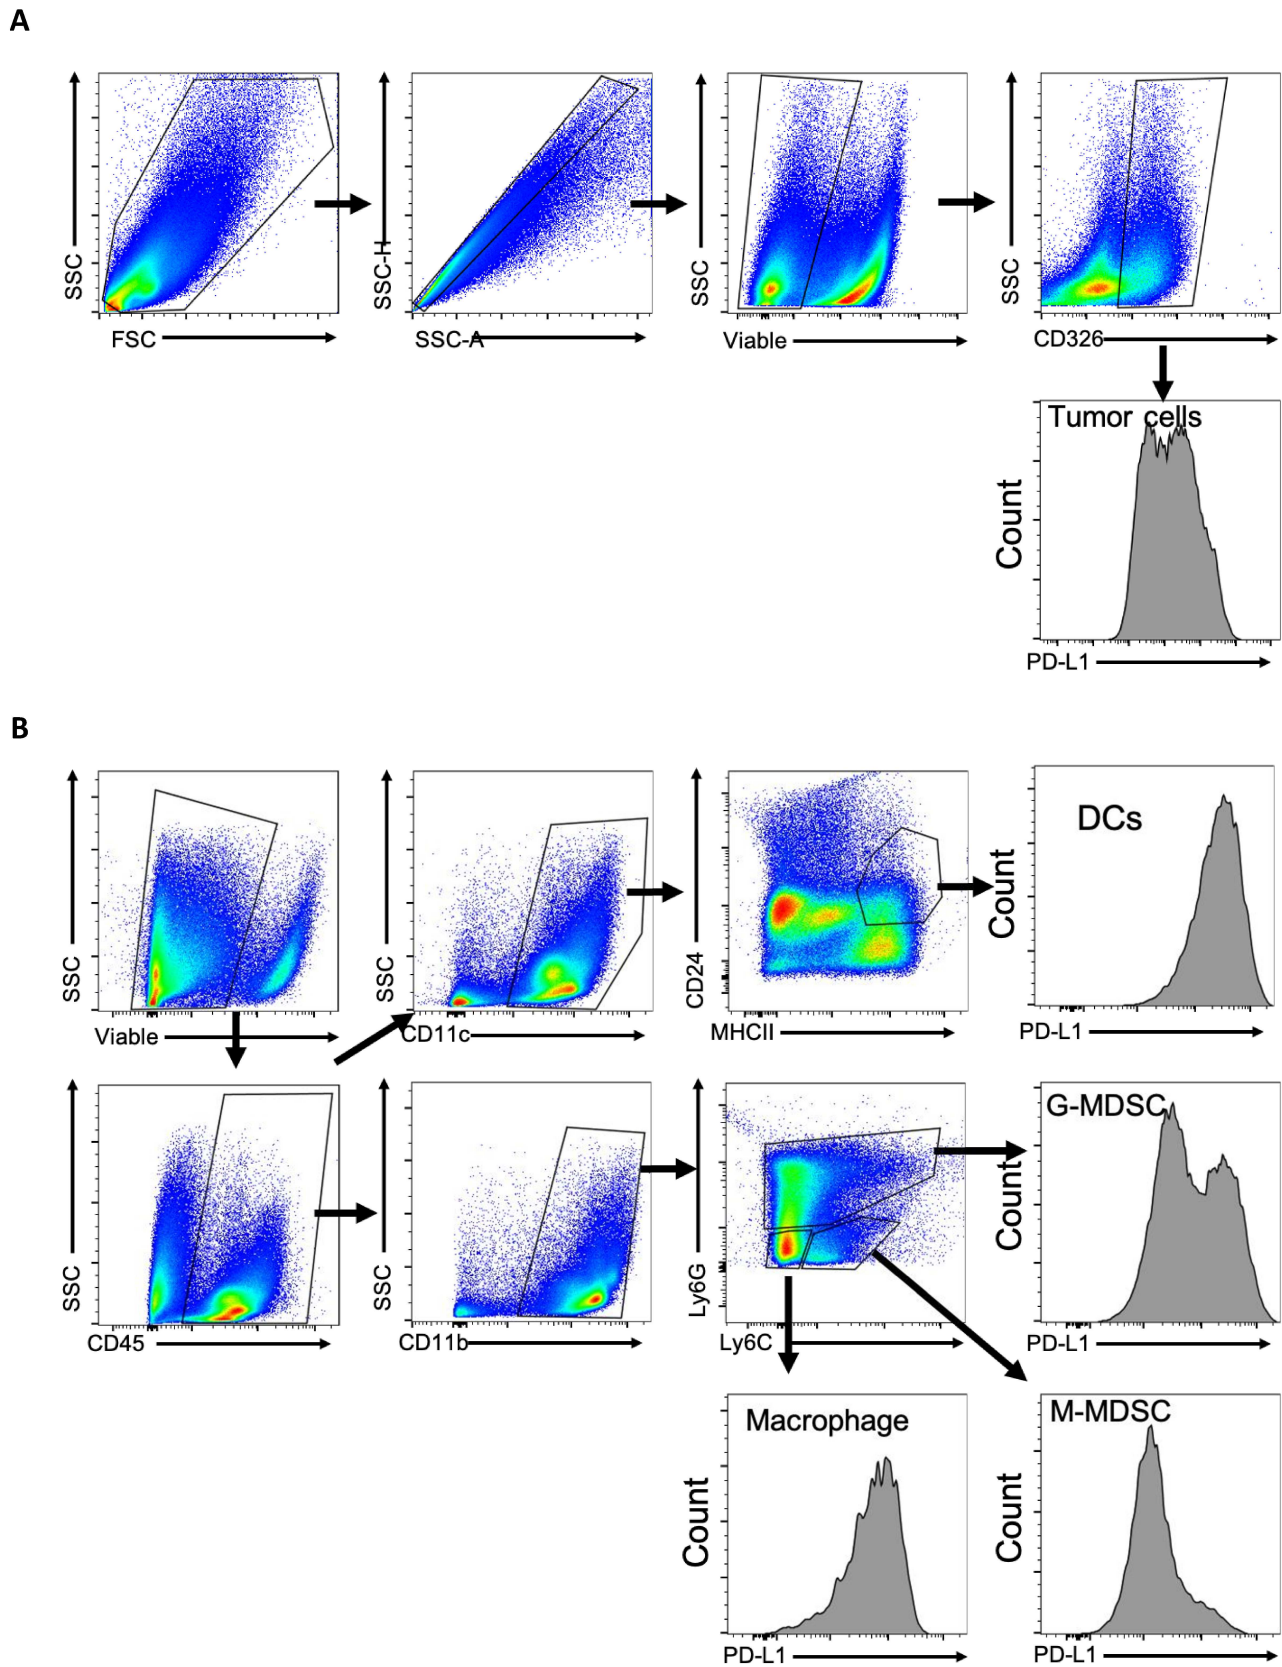

Figure S4



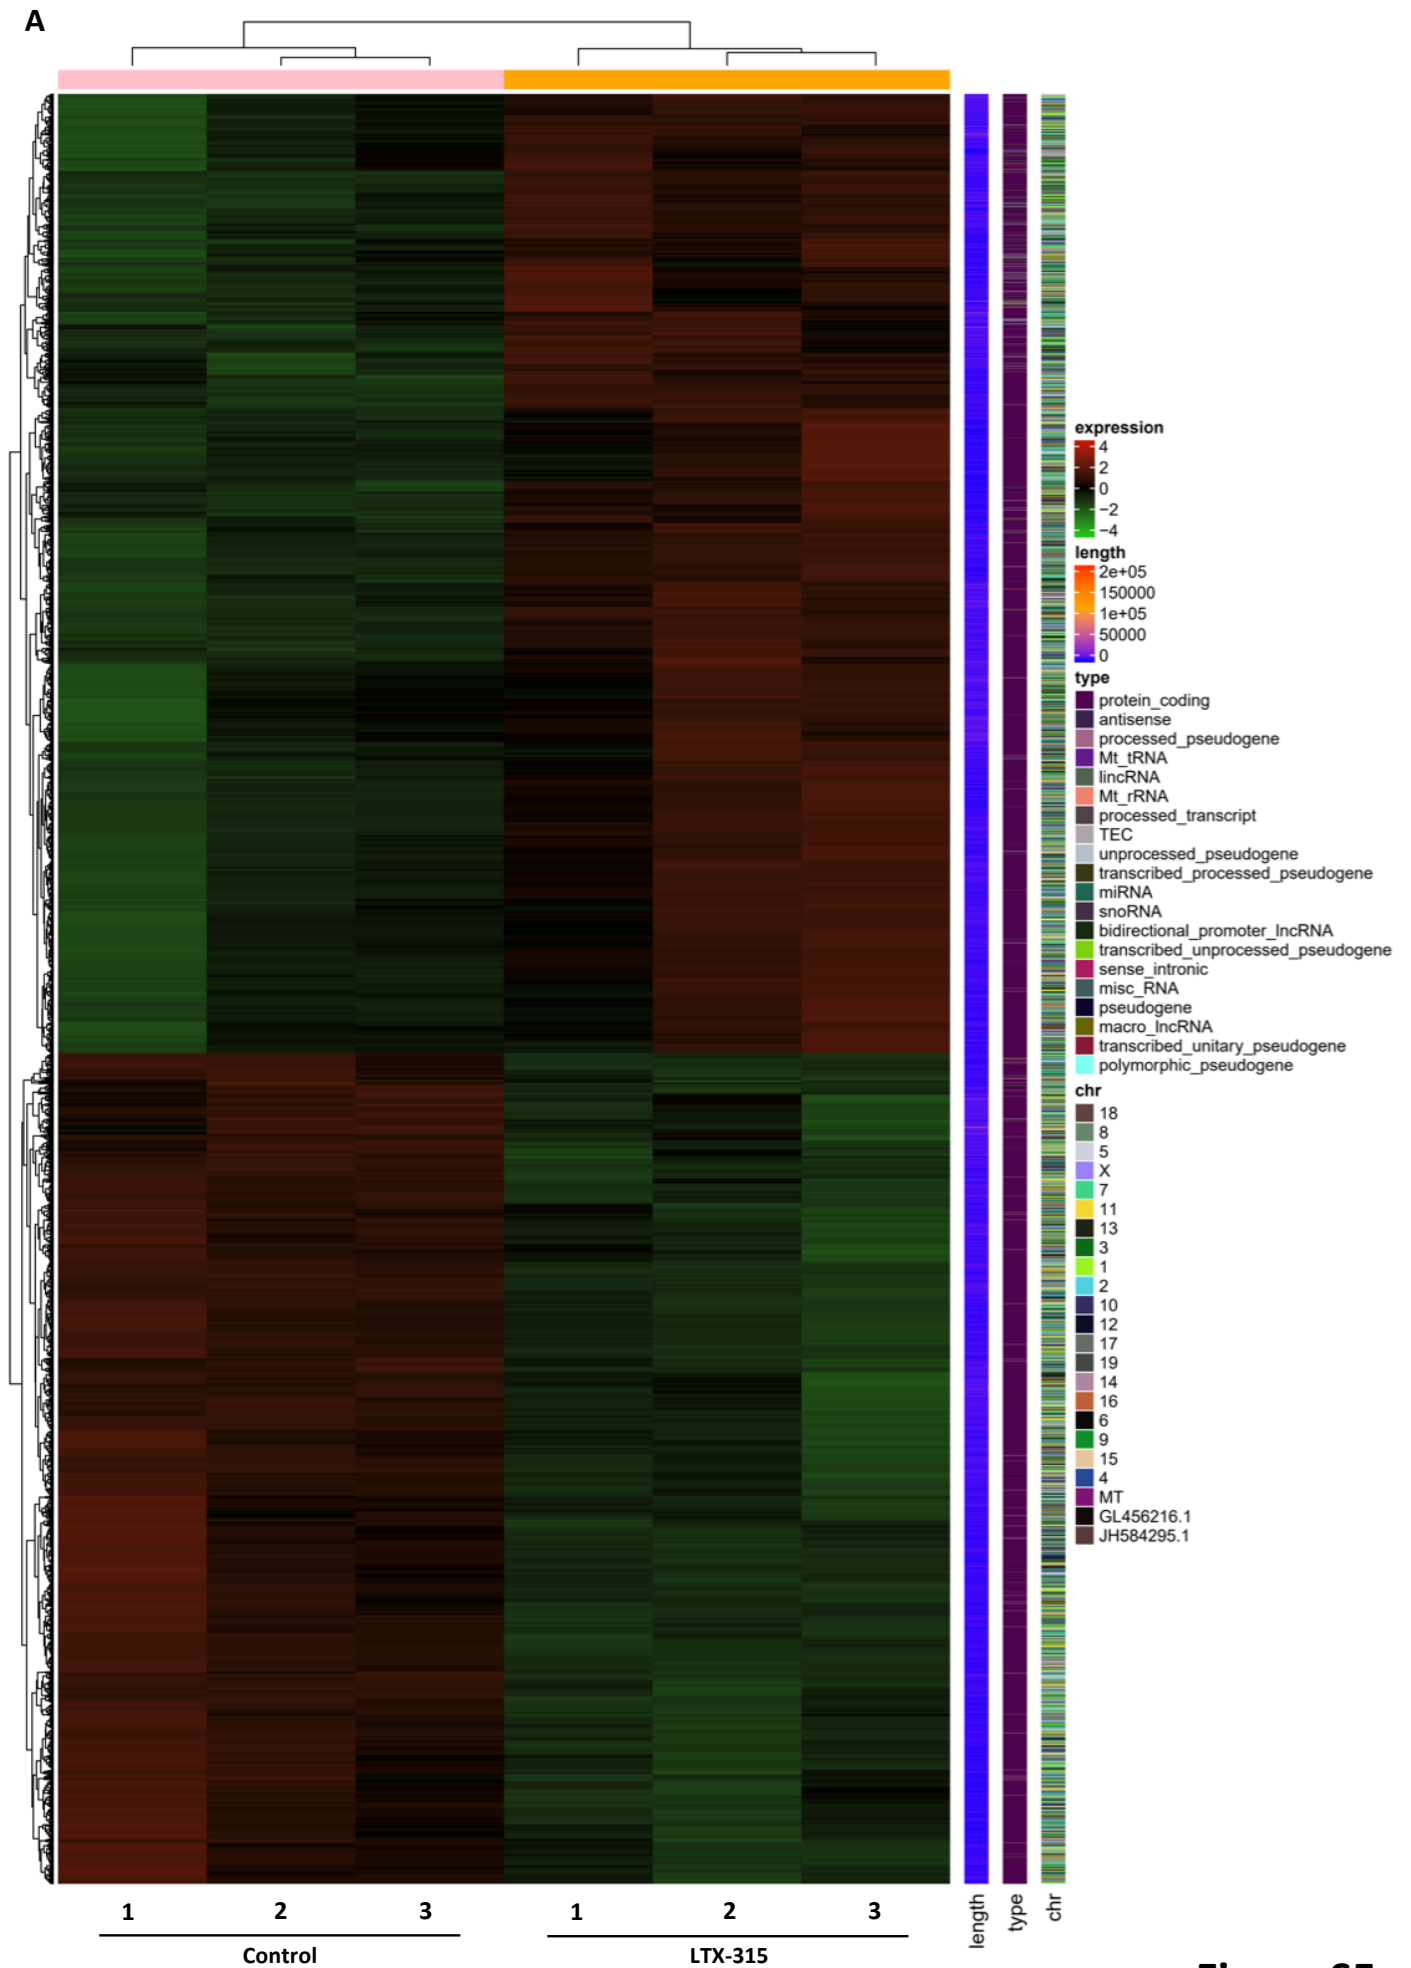

Figure S5

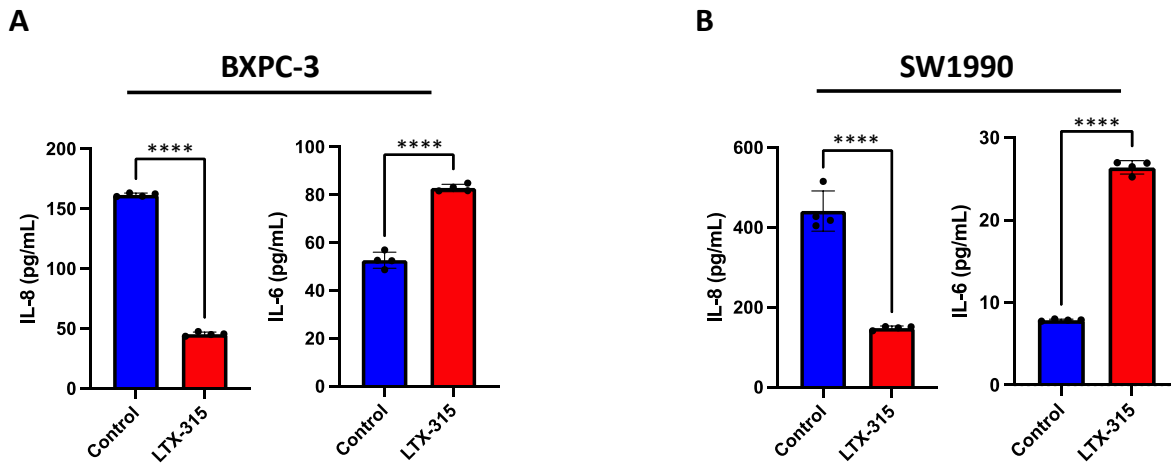

Figure S6

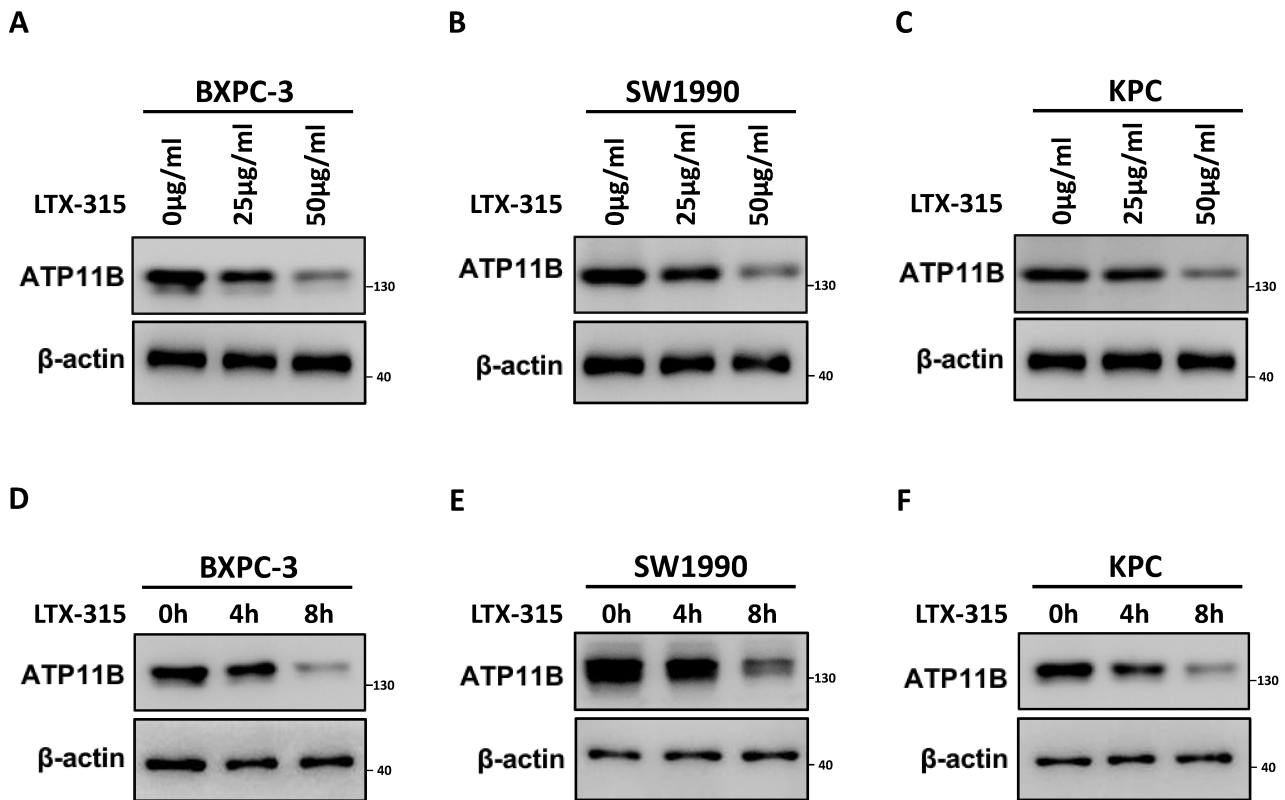

Figure S7

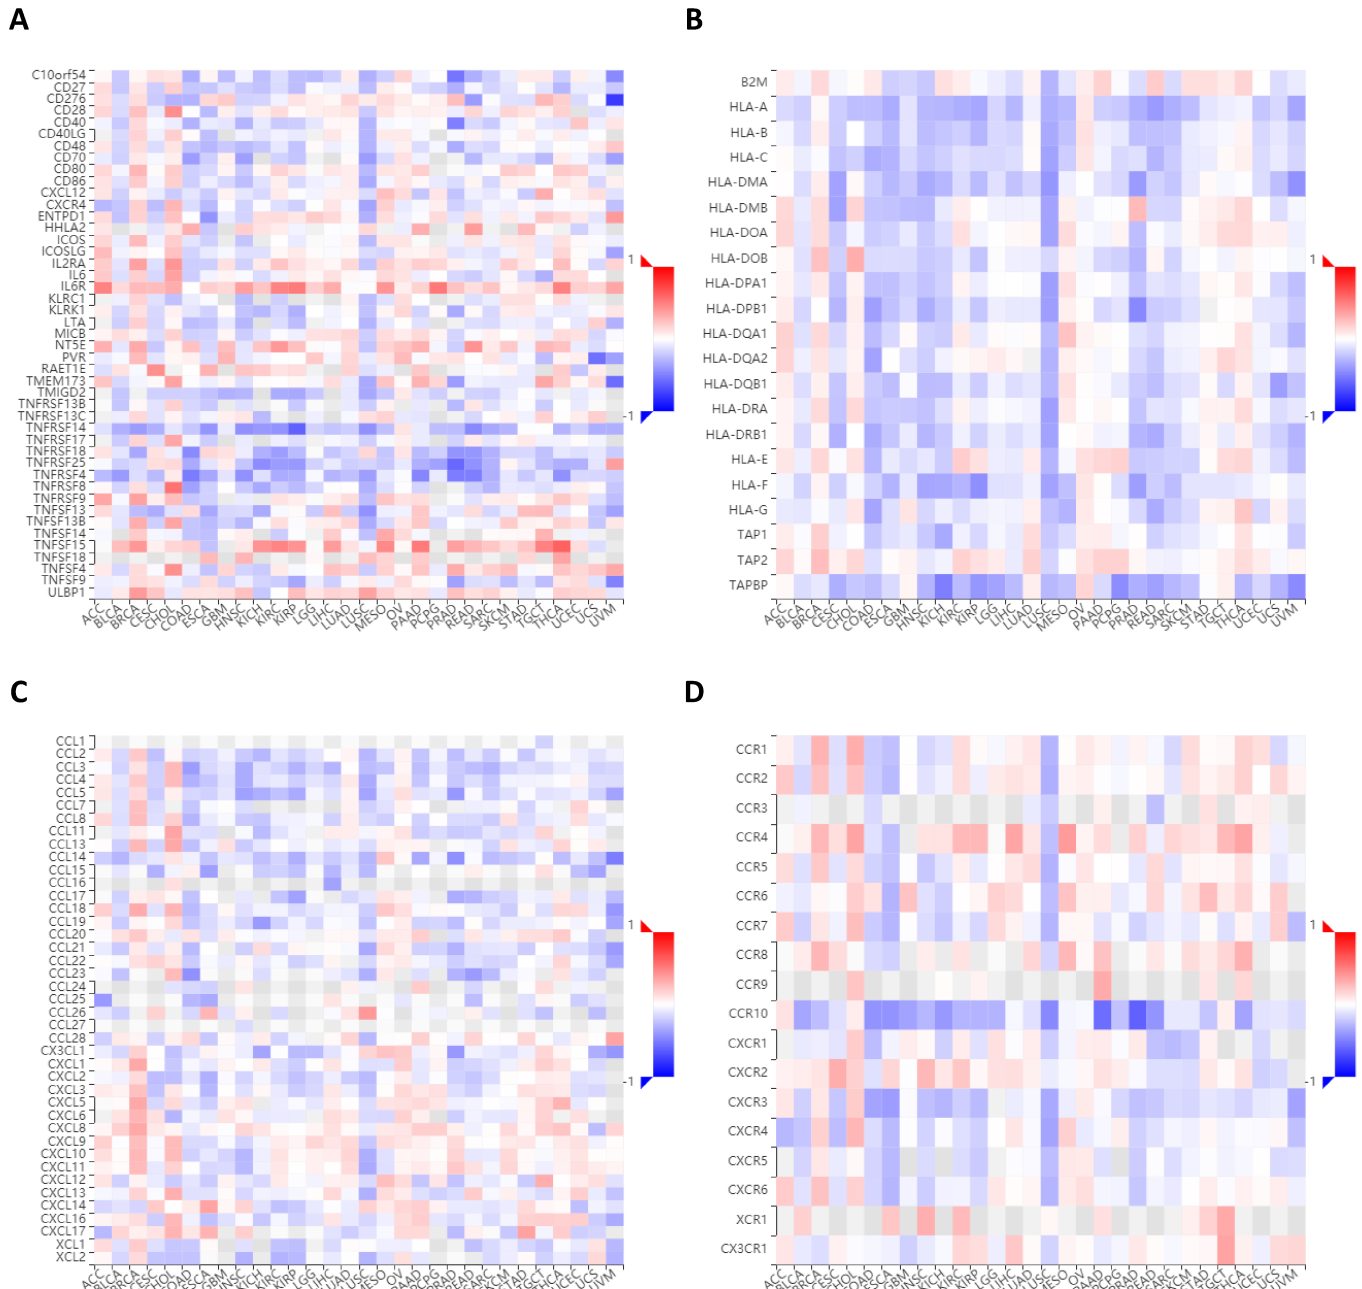

**Figure S8**

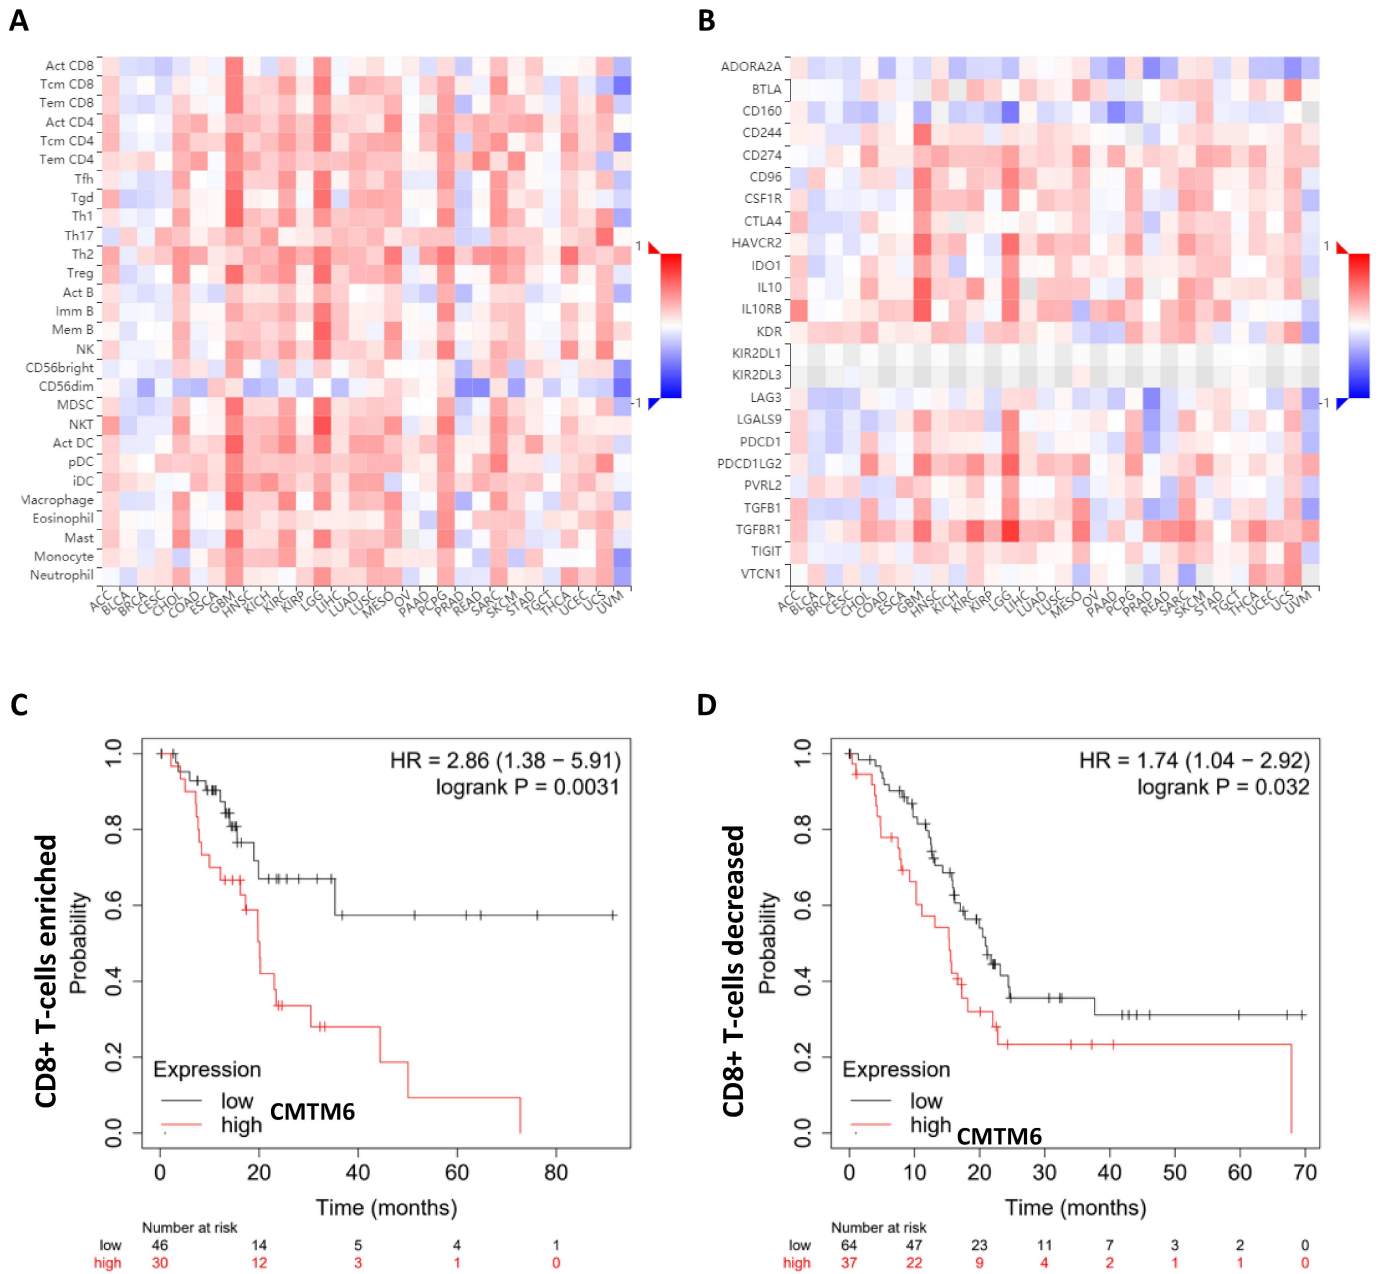

**Figure S9**

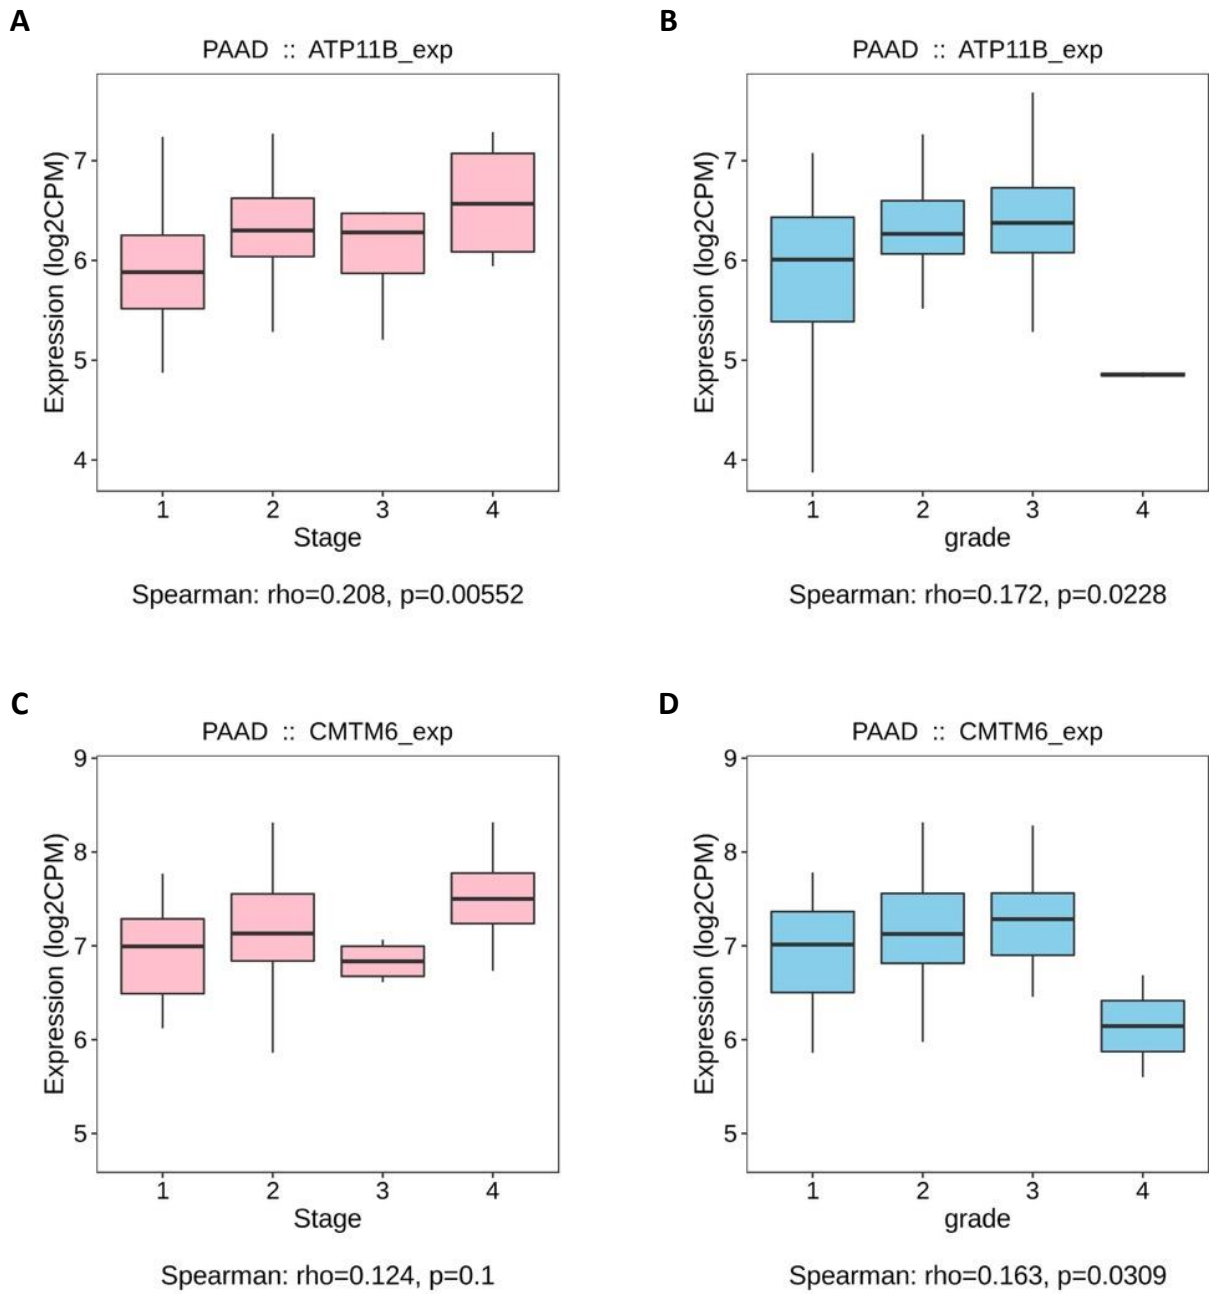

Figure S10



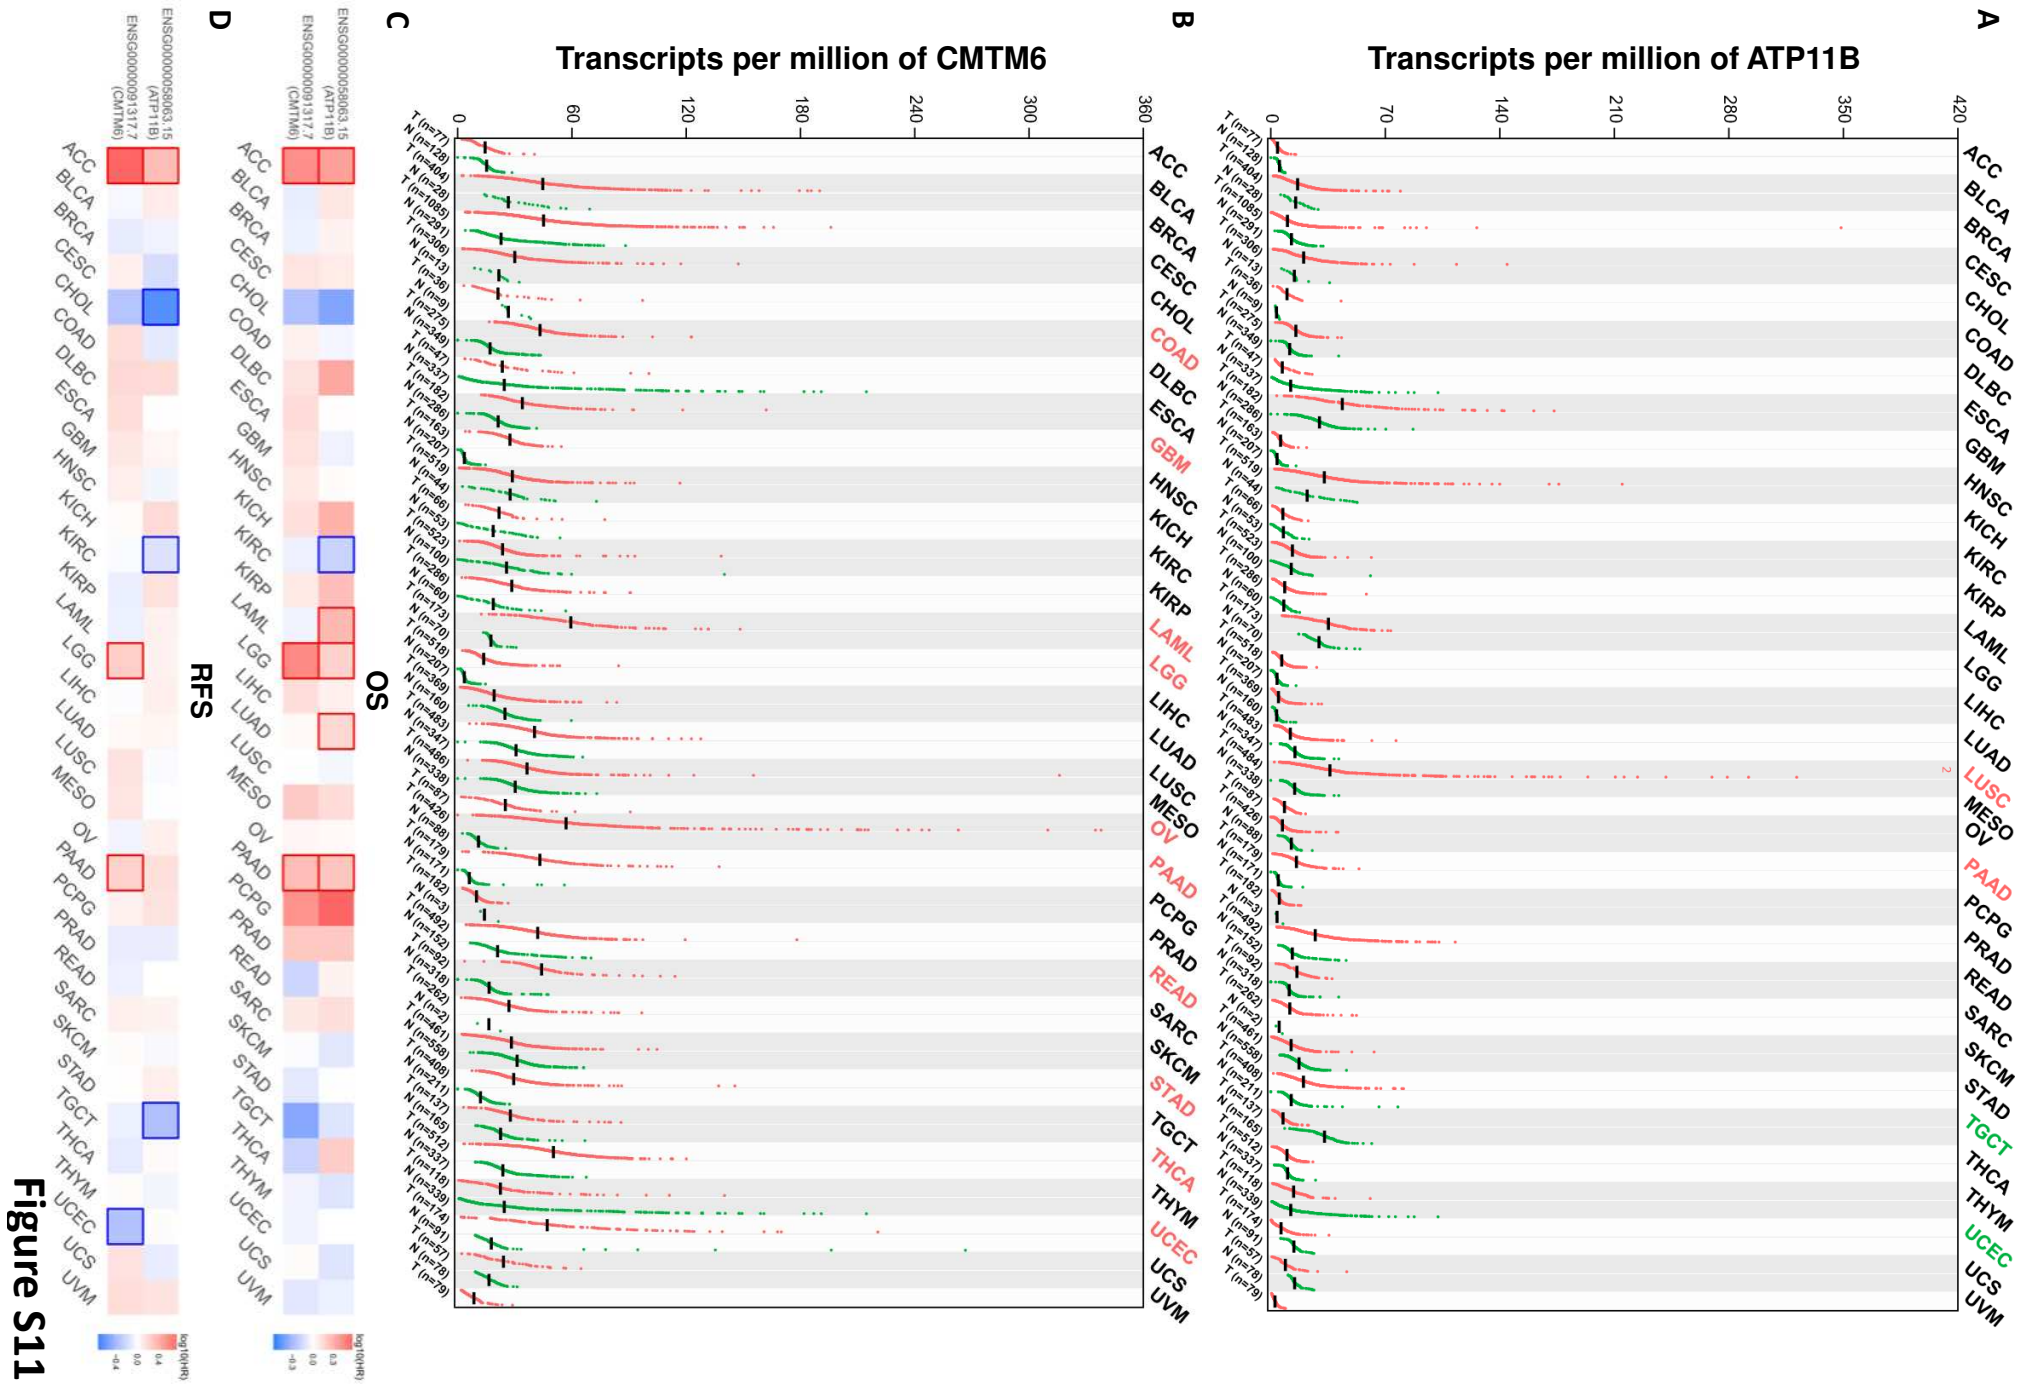

Figure S11

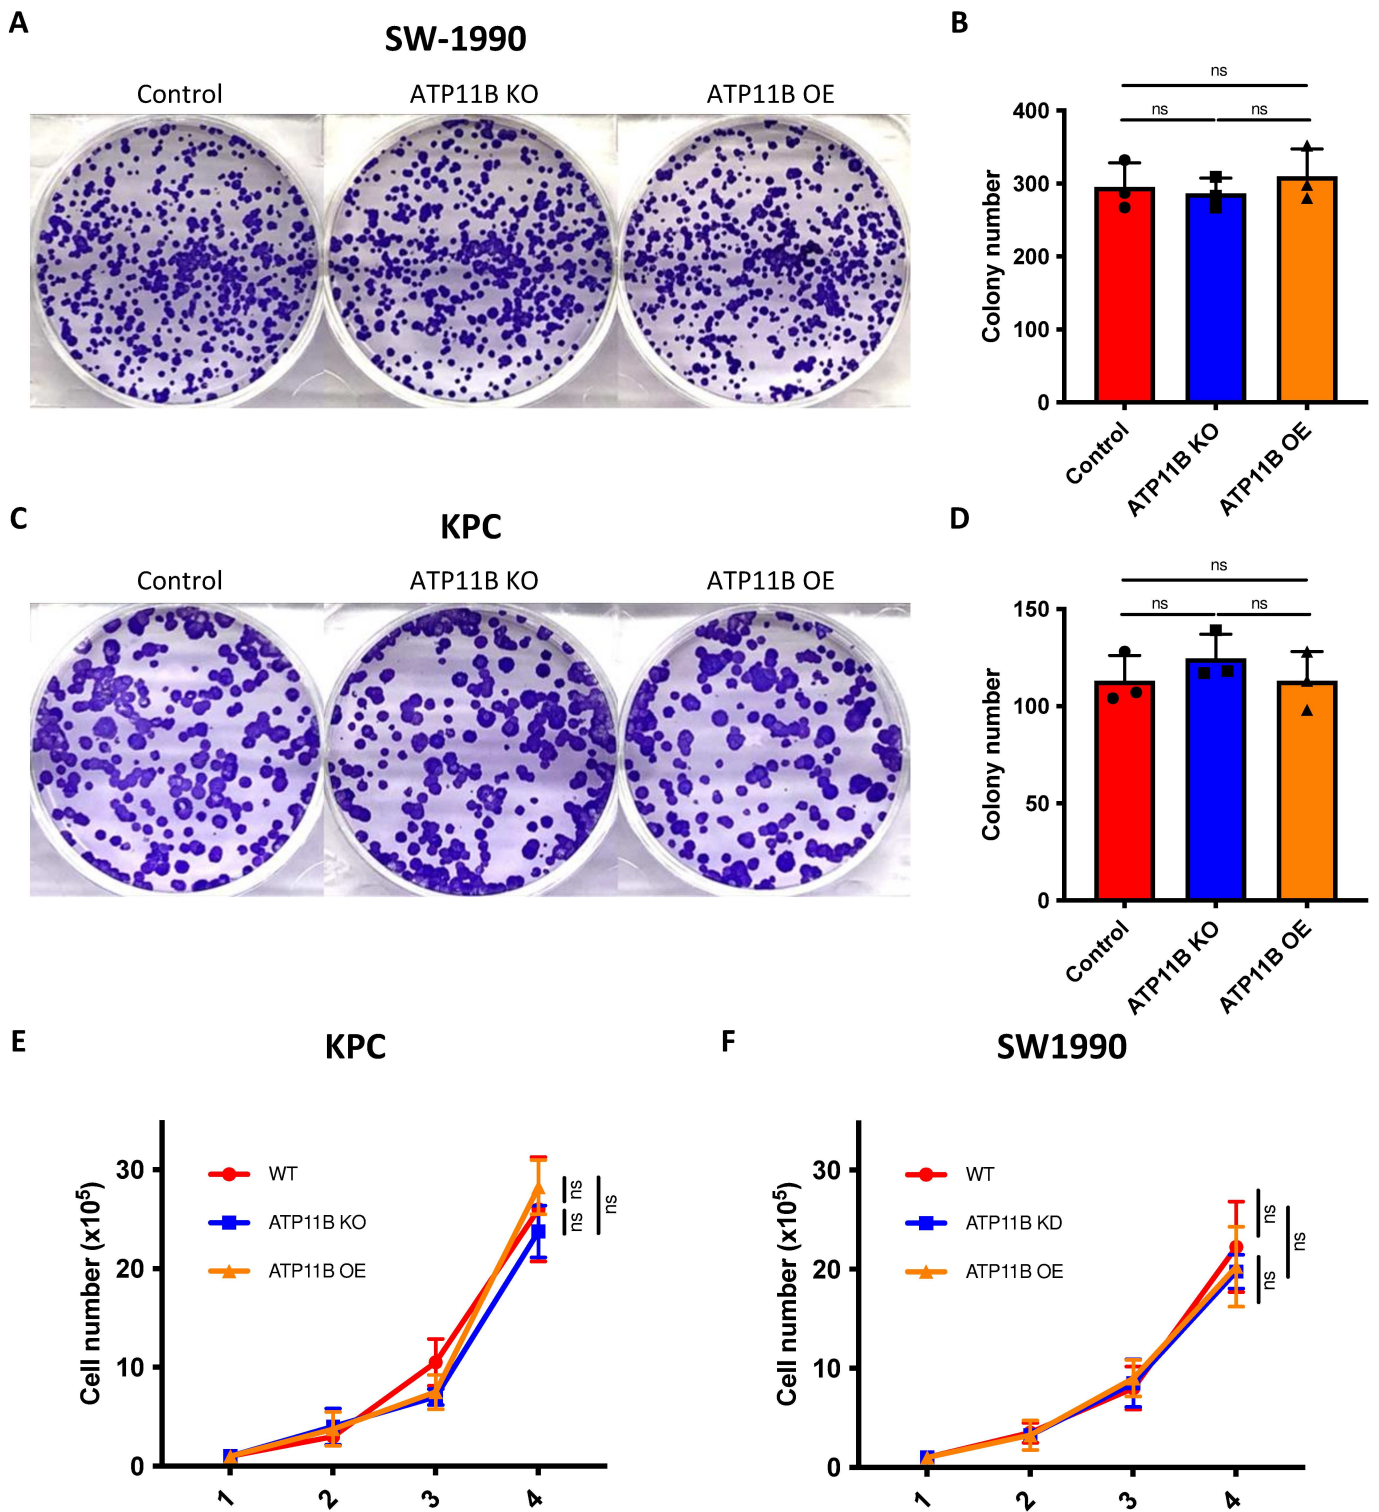

Figure S12



**A**

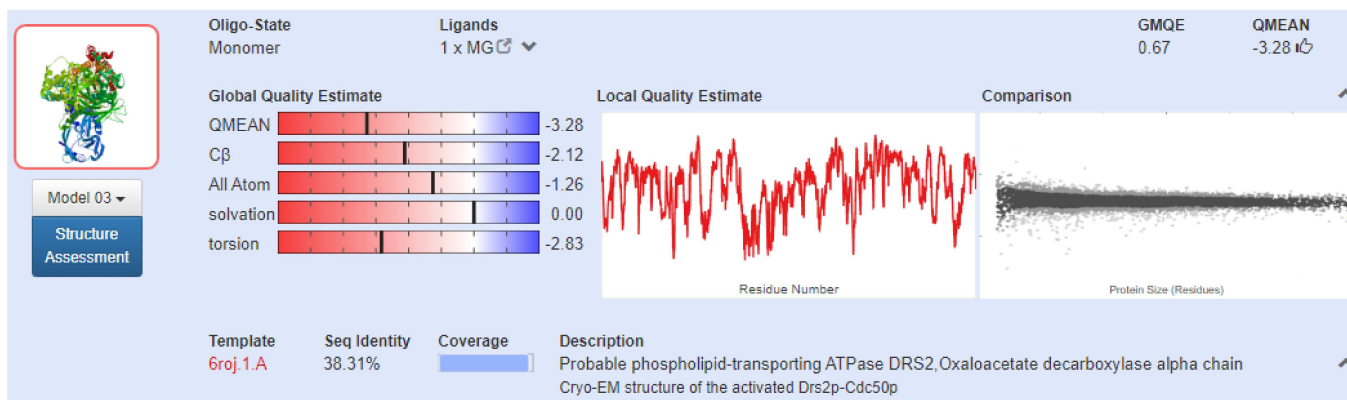

**B**

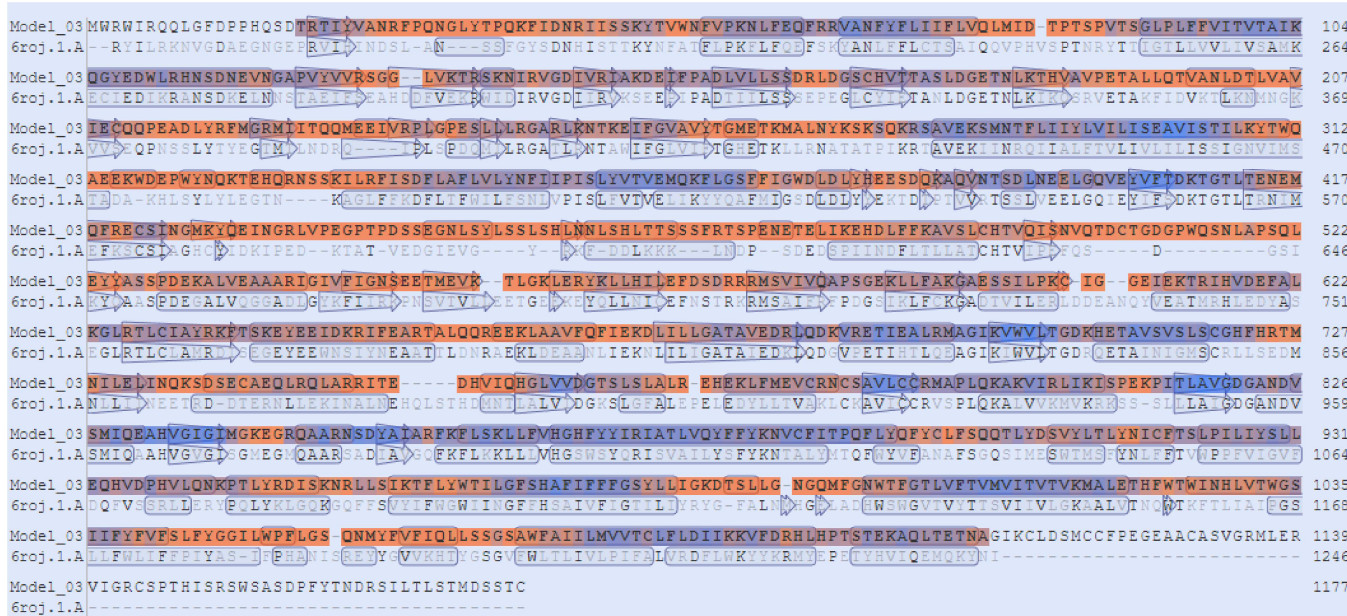

**C**

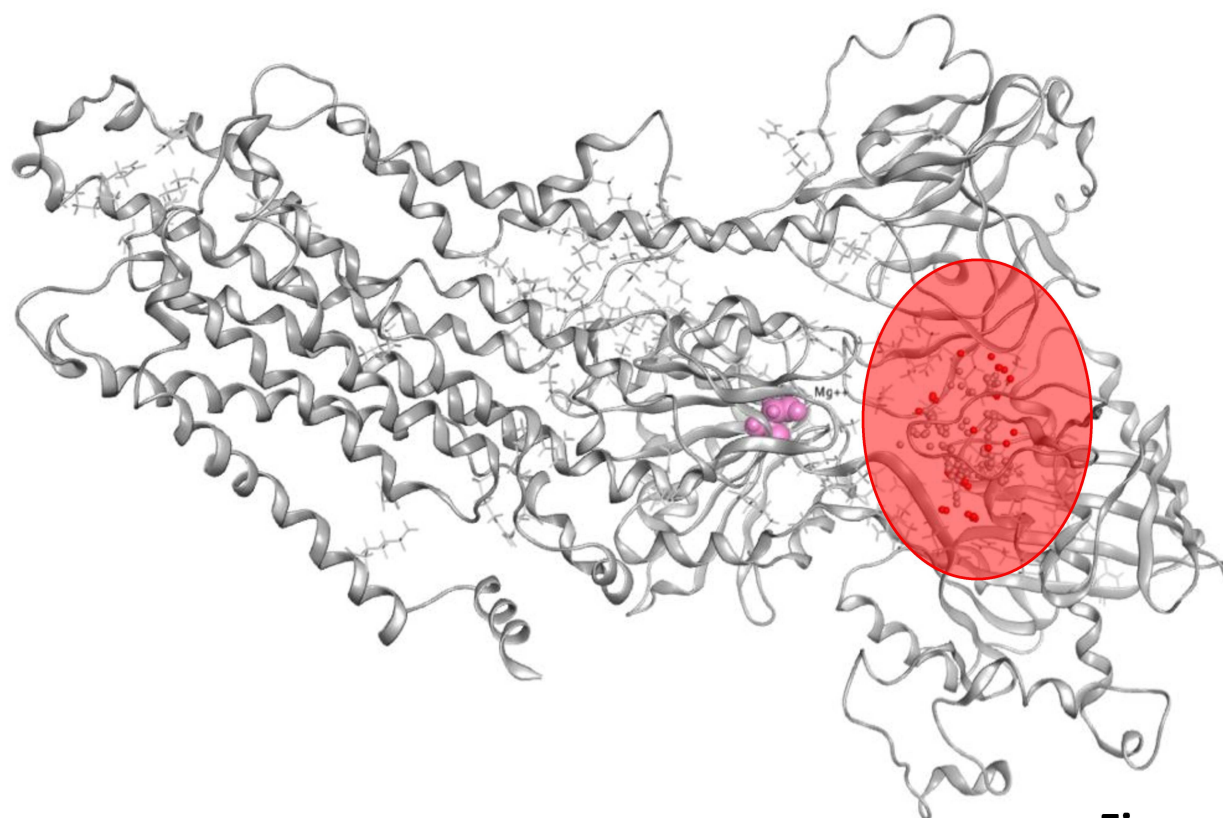

**Figure S13**

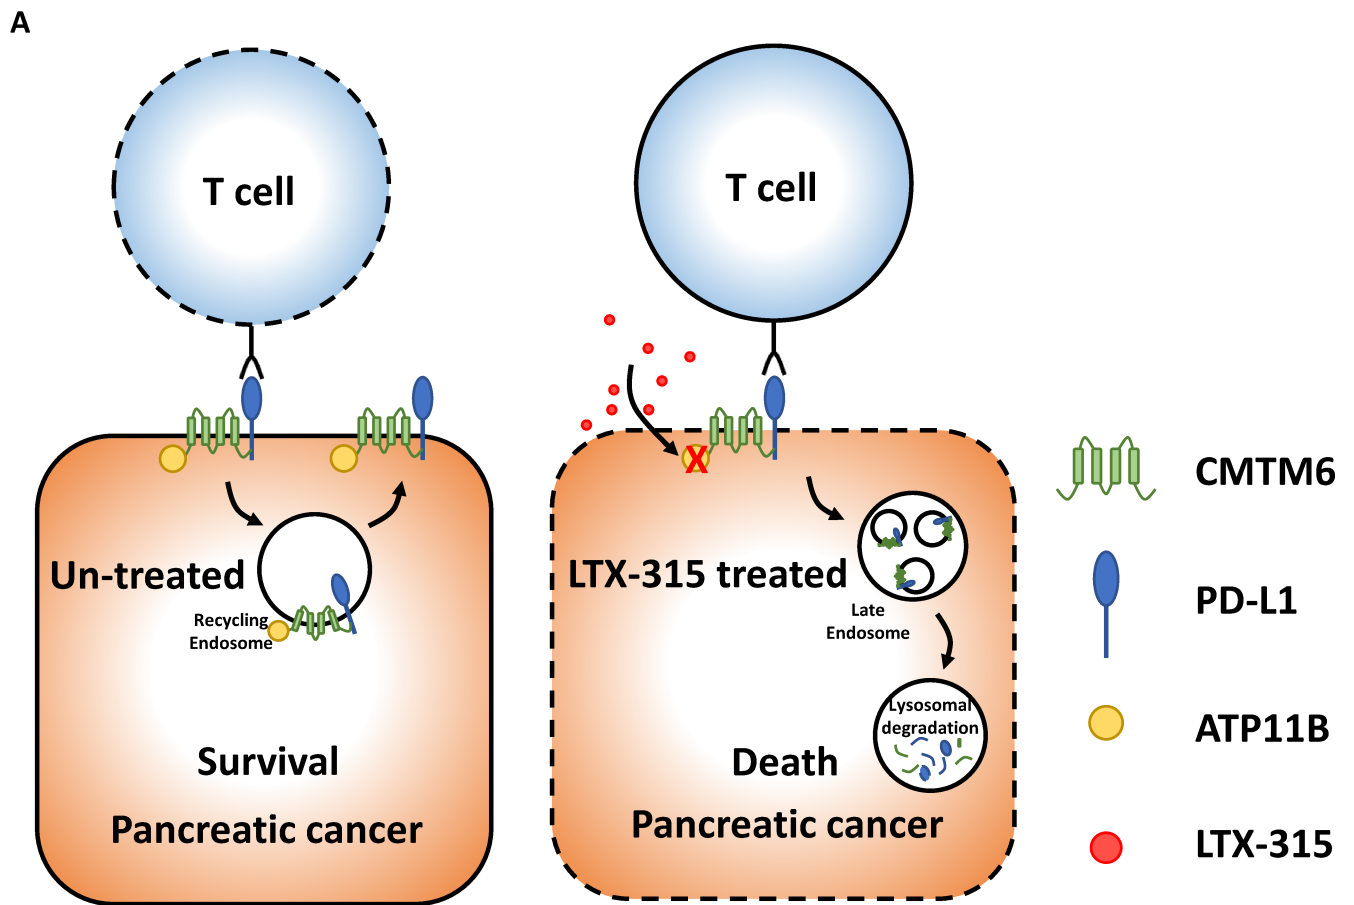**Figure S14**
